# Supplementary material for: Alternative promoter usage generates novel shorter MAPT mRNA transcripts in Alzheimer’s disease and progressive supranuclear palsy brains
Source: PubMed Central journal article supplement (PMC5626709; doi:10.1038/s41598-017-12955-7), 2017-10-03
Supplement: 41598_2017_12955_MOESM1_ESM.pdf [file 41598_2017_12955_MOESM1_ESM.pdf]

# **Alternative promoter usage generates novel shorter MAPT mRNA transcripts in Alzheimer's disease and progressive supranuclear palsy brains.**

Vincent Huin <sup>1,\*</sup>, Luc Buée <sup>1</sup>, Hélène Behal <sup>2</sup>, Julien Labreuche <sup>2</sup>, Bernard Sablonnière <sup>1</sup>, Claire-Marie Dhaenens <sup>1</sup>

<sup>1</sup> Univ. Lille, Inserm, CHU Lille, UMR-S 1172 - JPArc - Centre de Recherche Jean-Pierre AUBERT Neurosciences et Cancer, F-59000 Lille, France

<sup>2</sup> Univ. Lille, CHU Lille, EA 2694 - Santé publique : épidémiologie et qualité des soins, Unité de Biostatistiques, F-59000 Lille, France

\*Corresponding author: Vincent Huin

Inserm UMR-S 1172, JPArc, rue Polonovski, F-59045, Lille, France

Phone: +33 320622075

Fax: +33 320538562

vincent.huin@inserm.fr

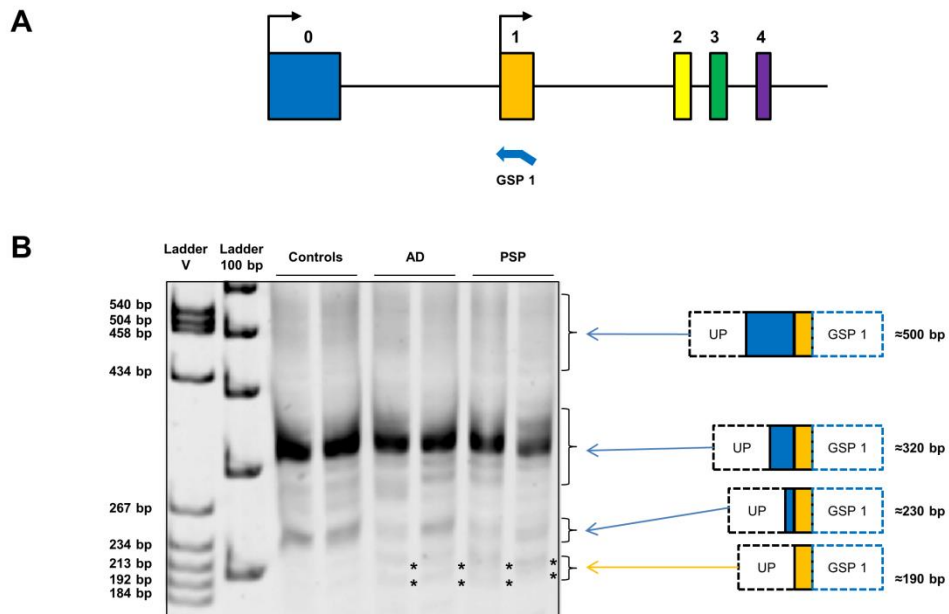

**Supplemental Figure S1: 5'RACE-PCR using gene specific primer 1.**

**A.** Schematic representation of the first *MAPT* exons and localization of GSP1. The percentage of short transcripts correspond to the ratio of the area under the curve of the transcripts starting at exon 1 (<194 bp) on the set of all the *MAPT* transcripts. **B.** Polyacrylamide gel electrophoresis of the products of 5'RACE-PCR and expected lengths using GSP1. UP: universal primer.

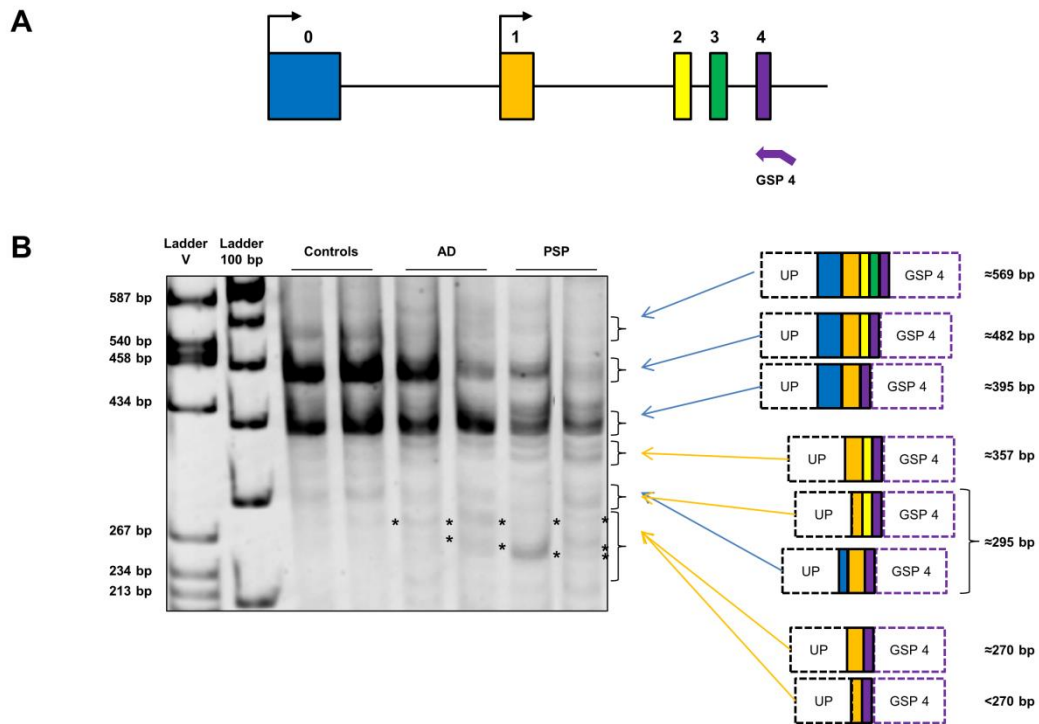

**Supplemental Figure S2: 5'RACE-PCR using GSP4.**

**A.** Schematic representation of the first *MAPT* exons and localization of GSP1. The percentage of short transcripts correspond to the ratio of the area under the curve of the transcripts starting at exon 1 (240-300 bp) and the AUC for all *MAPT* transcripts. **B.** Polyacrylamide gel electrophoresis of the products of 5'RACE-PCR and expected lengths using GSP4. UP: universal primer.

| Pool | Number of clones | TSS        |         | Included exons |   |   |   |   |    |   |   |   |   |   |    |    | First Kozak | Putative protein |        |        |
|------|------------------|------------|---------|----------------|---|---|---|---|----|---|---|---|---|---|----|----|-------------|------------------|--------|--------|
|      |                  | exon inton | cDNA    | 0              | 1 | 2 | 3 | 4 | 4a | 5 | 6 | 7 | 8 | 9 | 10 | 11 |             |                  | 12     | 13     |
| PSP  | 1                | Exon 0     | c.-222  | +              | + | + |   | + |    | + |   |   | + |   | +  | +  | +           | ?                | M1     | 1N4R   |
| PSP  | 1                | Exon 0     | c.-174  | +              | + | + | + | + |    | + |   |   | + |   | +  | +  | +           | ?                | M1     | 2N4R   |
| C    | 1                | Exon 0     | c.-172  | +              | + | + |   | + |    | + |   |   | + |   | +  |    | +           | ?                | M1     | 1N3R   |
| PSP  | 1                | Exon 0     | c.-170  | +              |   |   |   | + |    | + |   |   | + |   | +  | +  | +           | ?                | M127 ? | ΔΔ3R ? |
| PSP  | 1                | Exon 0     | c.-166  | +              | + |   |   | + |    | + |   |   | + |   | +  | +  | +           | ?                | M1     | 0N4R   |
| MA   | 1                | Exon 0     | c.-160  | +              | + |   |   | + |    | + |   |   | + |   | +  | +  | +           | ?                | M1     | 0N4R   |
| PSP  | 1                | Exon 0     | c.-160  | +              | + | + | + | + |    | + |   |   | + |   | +  | +  | +           | ?                | M1     | 2N4R   |
| PSP  | 1                | Exon 0     | c.-158  | +              | + | + |   | + |    | + |   |   | + |   | +  | +  | +           | ?                | M1     | 1N3R   |
| PSP  | 1                | Exon 0     | c.-155  | +              | + |   |   | + |    | + |   |   | + |   | +  | +  | +           | ?                | M1     | 0N3R   |
| PSP  | 1                | Exon 0     | c.-153  | +              | + | + |   | + |    | + |   |   | + |   | +  | +  | +           | ?                | M1     | 1N3R   |
| C    | 1                | Exon 0     | c.-153  | +              | + |   |   | + |    | + |   |   | + |   | +  | +  | +           | ?                | M1     | 0N3R   |
| PSP  | 1                | Exon 0     | c.-153  | +              | + |   |   | + |    | + | + |   | + |   | +  | +  | +           | ?                | M1     | 0N6+3R |
| PSP  | 1                | Exon 0     | c.-148  | +              | + | + |   | + |    | + |   |   | + |   | +  | +  | +           | ?                | M1     | 1N3R   |
| C    | 1                | Exon 0     | c.-144  | +              | + |   |   | + |    | + |   |   | + |   | +  | +  | +           | ?                | M1     | 0N3R   |
| PSP  | 2                | Exon 0     | c.-143  | +              | + | + |   | + |    | + |   |   | + |   | +  | +  | +           | ?                | M1     | 1N3R   |
| PSP  | 1                | Exon 0     | c.-141  | +              | + |   |   | + |    | + |   |   | + |   | +  | +  | +           | ?                | M1     | 0N3R   |
| PSP  | 1                | Exon 0     | c.-134  | +              | + | + |   | + |    | + |   |   | + |   | +  | +  | +           | ?                | M1     | 1N3R   |
| PSP  | 1                | Exon 0     | c.-125  | +              | + | + |   | + |    | + |   |   | + |   | +  | +  | +           | ?                | M1     | 1N4R   |
| PSP  | 1                | Exon 0     | c.-113  | +              | + |   |   | + |    | + |   |   | + |   | +  | +  | +           | ?                | M1     | 0N4R   |
| C    | 1                | Exon 0     | c.-106  | +              | + |   |   | + |    | + |   |   | + |   | +  | +  | +           | ?                | M127 ? | ΔΔ3R ? |
| PSP  | 1                | Exon 0     | c.-101  | +              | + | + |   | + |    | + |   |   | + |   | +  | +  | +           | ?                | M1     | 1N4R   |
| C    | 1                | Exon 0     | c.-94   | +              | + |   |   | + |    | + |   |   | + |   | +  | +  | +           | ?                | M1     | 0N3R   |
| PSP  | 1                | Exon 0     | c.-54   | +              | + |   |   | + |    | + |   |   | + |   | +  | +  | +           | ?                | M1     | 0N3R   |
| MA   | 1                | Exon 0     | c.-54   | +              | + |   |   | + |    | + |   |   | + |   | +  | +  | +           | ?                | M1     | 0N3R   |
| PSP  | 1                | Exon 0     | c.-53   | +              | + | + | + | + |    | + |   |   | + |   | +  | +  | +           | ?                | M1     | 2N4R   |
| C    | 1                | Exon 0     | c.-51   | +              | + |   |   | + |    | + |   |   | + |   | +  | +  | +           | ?                | M1     | 0N3R   |
| MA   | 1                | Exon 0     | c.-47   | +              | + |   |   | + |    | + |   |   | + |   | +  | +  | +           | ?                | M1     | 0N3R   |
| C    | 1                | Exon 0     | c.-38   | +              | + | + |   | + |    | + |   |   | + |   | +  | +  | +           | ?                | M1     | 1N3R   |
| C    | 1                | Exon 0     | c.-38   | +              | + |   |   | + |    | + |   |   | + |   | +  | +  | +           | ?                | M1     | 0N3R   |
| MA   | 1                | Exon 0     | c.-35   | +              | + |   |   | + |    | + |   |   | + |   | +  | +  | +           | ?                | M1     | 0N3R   |
| C    | 1                | Exon 0     | c.-28   | +              | + |   |   | + |    | + |   |   | + |   | +  | +  | +           | ?                | M1     | 0N4R   |
| C    | 1                | Intron 0   | c.-17-3 |                | + | + |   | + |    | + |   |   | + |   | +  | +  | +           | ?                | M1     | 1N3R   |
| C    | 1                | Intron 0   | c.-17-3 |                | + |   |   | + |    | + |   |   | + |   | +  | +  | +           | ?                | M1     | 0N3R   |
| C    | 1                | Intron 0   | c.-17-2 |                | + |   |   | + |    | + |   |   | + |   | +  | +  | +           | ?                | M1     | 0N4R   |
| PSP  | 1                | Intron 0   | c.-17-2 |                | + |   |   | + |    | + |   |   | + |   | +  | +  | +           | ?                | M1     | 0N3R   |
| PSP  | 1                | Exon 1     | c.-9    |                | + |   |   | + |    | + |   |   | + |   | +  | +  | +           | ?                | M1     | 0N3R   |
| MA   | 1                | Exon 1     | c.-7    |                | + | + |   | + |    | + |   |   | + |   | +  | +  | +           | ?                | M1     | 1N3R   |
| PSP  | 2                | Exon 1     | c.7     |                | + | + |   | + |    | + |   |   | + |   | +  | +  | +           | ?                | M11    | Δ3R    |
| C    | 1                | Exon 1     | c.52    |                | + |   |   | + |    | + |   |   | + |   | +  | +  | +           | ?                | M127   | ΔΔ4R   |
| PSP  | 2                | Exon 1     | c.75    |                | + |   |   | + |    | + |   |   | + |   | +  | +  | +           | ?                | M127   | ΔΔ4R   |
| PSP  | 1                | Exon 1     | c.80    |                | + |   |   | + |    | + |   |   | + |   | +  | +  | +           | ?                | M127   | ΔΔ4R   |
| MA   | 1                | Exon 1     | c.90    |                | + | + |   | + |    | + |   |   | + |   | +  | +  | +           | ?                | M127   | ΔΔ3R   |
| PSP  | 1                | Exon 1     | c.94    |                | + | + |   | + |    | + |   |   | + |   | +  | +  | +           | ?                | M127   | ΔΔ3R   |
| C    | 1                | Exon 1     | c.108   |                | + | + |   | + |    | + |   |   | + |   | +  | +  | +           | ?                | M127   | ΔΔ3R   |
| MA   | 1                | Exon 1     | c.108   |                | + | + |   | + |    | + |   |   | + |   | +  | +  | +           | ?                | M127   | ΔΔ4R   |
| MA   | 1                | Exon 2     | c.160   |                | + |   |   | + |    | + |   |   | + |   | +  | +  | +           | ?                | M127   | ΔΔ4R   |
| C    | 1                | Exon 2     | c.179   |                | + |   |   | + |    | + |   |   | + |   | +  | +  | +           | ?                | M127   | ΔΔ4R   |
| C    | 1                | Exon 2     | c.186   |                | + | + |   | + |    | + |   |   | + |   | +  | +  | +           | ?                | M127   | ΔΔ3R   |
| PSP  | 1                | Exon 2     | c.195   |                | + | + |   | + |    | + |   |   | + |   | +  | +  | +           | ?                | M127   | ΔΔ3R   |
| C    | 1                | Exon 2     | c.195   |                | + |   |   | + |    | + |   |   | + |   | +  | +  | +           | ?                | M127   | ΔΔ3R   |
| MA   | 1                | Exon 2     | c.201   |                | + |   |   | + |    | + |   |   | + |   | +  | +  | +           | ?                | M127   | ΔΔ4R   |

**Supplemental Table S1: List of the *MAPT* transcripts in human brain cloned by 5'RACE.**

AD: the pool of AD patients; C: the pool of controls; M1: methionine 1; M11: methionine 11; M127, methionine 127; PSP: the pool of PSP patients; Δ: putative N-terminal truncated tau proteins lacking codons 1 to 10; ΔΔ: putative N-terminal truncated tau proteins lacking codons 1 to 126. The locations of the nucleotides on the cDNA of the *MAPT* gene correspond to the longest isoform of tau protein in brain (Nm\_005910.5/Np\_005901; GRCh37/Hg19).
